# Supplementary material
Source: PubMed Central journal article supplement (PMC4118746)
Supplement: NIHMS507874-supplement-Table_1A.pdf [file NIHMS507874-supplement-Table_1A.pdf]

# Prognostic Factors for Survival in Adult Patients With Recurrent Glioma Enrolled Onto the New Approaches to Brain Tumor Therapy CNS Consortium Phase I and II Clinical Trials

## Supplemental Data

Table A1.

Description of NABTT CNS Consortium Trials Included in This Study

| NABTT Trial         | Phase | No. of Patients | Description of Treatment                                                                                                                                                                                                                                                                    |
|---------------------|-------|-----------------|---------------------------------------------------------------------------------------------------------------------------------------------------------------------------------------------------------------------------------------------------------------------------------------------|
| 9-Aminocamptothecin | I/II  | 22/21           | Administered as a 72-hour IV infusion every 2 weeks; starting dose of 850 $\mu\text{g}/\text{m}^2/24$ hours was escalated to 1,611 $\mu\text{g}/\text{m}^2/24$ hours for patients taking EIACs                                                                                              |
| Suramin             | II    | 11              | Fixed doses infused during 1 hour                                                                                                                                                                                                                                                           |
| Oral phenylbutyrate | I     | 21              | Dose escalations of 9, 18, 27, and 36 g/d administered orally in three equally divided doses                                                                                                                                                                                                |
| Aprinocarsen        | II    | 21              | Administered as a 21-day infusion at a rate of 2.0 mg/kg/d, followed by 7 days of no treatment, then repeated                                                                                                                                                                               |
| Irinotecan          | I/II  | 40/18           | Weekly 90-minute IV infusion for 4 weeks, then repeated every 6 weeks; starting dose was 125 mg/ $\text{m}^2/\text{wk}$ , MTD was 117 mg/ $\text{m}^2/\text{wk}$ for EIAC-and 411 mg/ $\text{m}^2/\text{wk}$ for patients taking EIACs                                                      |
| Oral procarbazine   | I     | 49              | Dose escalation of procarbazine given orally once daily for 5 consecutive days repeated monthly; starting dose was 200 mg/ $\text{m}^2/\text{d}$ and MTD was 393 mg/ $\text{m}^2/\text{d}$ for patients taking EIACs and $\geq 334$ mg/ $\text{m}^2/\text{d}$ for patients not taking EIACs |
| Carmustine wafers   | I     | 43              | Dose escalation study of carmustine polymers from 6.5% to 28% carmustine by weight; MTD was 20%                                                                                                                                                                                             |

| NABTT Trial                          | No. of |          | Description of Treatment                                                                                                                                                                      |
|--------------------------------------|--------|----------|-----------------------------------------------------------------------------------------------------------------------------------------------------------------------------------------------|
|                                      | Phase  | Patients |                                                                                                                                                                                               |
| GliaSite RTS                         | I      | 21       | Safety and feasibility study of an implanted inflatable balloon catheter and liquid iodine-125 brachytherapy                                                                                  |
| Onyx-015                             | I      | 24       | Dose escalation study of an intratumoral injection with an E1B-attenuated adenovirus                                                                                                          |
| Carmustine and IV O <sup>6</sup> -BG | I      | 42       | Establish the dose of continuous IV infusion of O <sup>6</sup> -BG (combined with 3.85% carmustine wafers) that suppresses alkylating-DNA alkyl transferase and escalate duration of infusion |

Abbreviations: NABTT, New Approaches to Brain Tumor Therapy; IV, intravenous; EIAC, enzyme-inducing anticonvulsants; MTD, maximum-tolerated dose; RTS, Radiation Therapy System; O<sup>6</sup>-BG, O<sup>6</sup>-benzylguanine.
